# Supplementary material for: Indicators of resilience and healthcare outcomes: findings from the 2010 health and retirement survey
Source: Springer Nature journal article supplement (doi:10.1007/s11136-015-1144-y), 2015-10-17
Supplement: MOESM1 [file 10682646]

**Supplemental Table 1**: Resilience indicators as linear variables in number of doctor’s visits, hospitalization, or improved self-rated health; Adults aged 50 and 70 years old, 2010 HRS cohort

|  | **# Doctor Visits** | | | **Hospitalization**  **Risk**  (Any vs None) | **Improved SRH** |
| --- | --- | --- | --- | --- | --- |
| **Resilience Indicators** | Estimated Number (95% CI) | | | OR (95% CI) | OR (95% CI) |
| *Cumulative Lifetime Adversity§* | |  | |  |  |
| 0 | 0.79 (0.40, 1.17) | | | 1.16 (1.12, 1.20) | **1.08 (1.02, 1.14)** |
| 1 - 2 | **2.13 (0.42, 3.83)** | | | **1.25 (1.01, 1.55)** | 0.86 (0.70, 1.07) |
| 3 - 4 | **2.24 (0.23, 4.24)** | | | **1.80 (1.42, 2.68)** | 1.11 (0.86, 1.43) |
| 5+ | **5.72 (3.14, 8.30)** | | | **2.42 (1.85, 3.17)** | 1.34 (0.96, 1.89) |
| *Social Support* |  | | |  |  |
| +Social Support *§* | -0.18 (-0.52, 0.16) | | | 0.99 (0.94, 1.04) | 0.94 (0.87, 1.01) |
| - Social Support *§* | 0.03 (-0.07, 0.14) | | | 1.01 (0.99, 1.02) | 1.0 (0.97, 1.02) |
| *Global Mastery§* | -0.17 (-0.82, 0.49) | | | 0.96 (0.90, 1.03) | 1.1 (0.99, 1.24) |
|  |  | | |  |  |
| *Domain-specific Mastery§* | | |  |  |  |
| Health  Social Life  Finances | **-0.98 (-1.31, -0.66)**  -0.04 (-0.38, 0.29)  -0.20 (-0.48, 0.08) | | | **0.91 (0.88, 0.94)**  **0.97 (0.94, 1.00)**  **0.96 (0.93, 0.98)** | **1.13 (1.06, 1.19)**  1.04 (0.98, 1.10)  1.02 (0.97, 1.07) |
| **Note:** To respond to reviewer’s question, we created **t**hese tables. It shows the difference of using health care utilization as continuous measures. For each level of resilience indicator, the table shows estimated number or likelihood of change §Per unit increase. This table is for informal purposes and is not included in the revised paper.  Estimates for # of doctor’s visits is derived from a multivariable linear regression model. Example: ‘*HRS participants with a cumulative lifetime adversity score of 5 or more have 3 to 8 additional doctor visits in the prior two years compared to persons whose score is 1 or 2*.’  Associations for hospitalization and improved SRH endpoints are derived from a logistic regression model with evidence of hospitalization as ‘Any’ and improvements in SRH estimated from the 2008 report. Example: ‘*HRS participants with an adversity score of 5 or more are between 85 to 300 percent more likely to report an overnight hospital stay in the prior two years than those with a score of one or two.’*  Multivariable model is adjusted for the following potential confounders: history of loss, age, sex, level of education, smoking, body mass index, physical activity level (any vs. none), US vs. foreign born, fall, insomnia, and racial classification (black, white vs. other). **CI = confidence interval | | | | | |

**Supplemental Table 2**:

Detailed comparison using different approaches to defining exposure and outcome.

|  | |  | **OUTCOMES** |  |  |
| --- | --- | --- | --- | --- | --- |
| **Column A** | | **Column B** | **Column C** | **Column D** | **Column E** |
|  | **# Doctor Visits**  **(Linear Regression)** | |  | **≥20 Doctor Visits (Logistic regression)** | **≥7 Doctor Visits (Logistic regression)** |
| *Exposure* | | Difference (95% CI) | *Exposure* | OR (95% CI) |  |
|  | |  |  |  |  |
| *Cumulative Lifetime Adversity* | |  | *Cumulative*  *Lifetime Adversity* |  |  |
| 0 (ref)  1 - 2  3 - 4  5+ | | **0.79 (0.40, 1.17)**  **2.13 (0.42, 3.83)**  **2.24 (0.23, 4.24)**  **5.72 (3.14, 8.30)** | 0 (Ref)  1 - 2  3 - 4  5+ | 1.11 (1.06, 1.16)  **1.34 (1.04, 1.73)**  **1.59 (1.21, 2.10)**  **2.18 (1.60, 2.97)** | 1.07 (1.04, 1.11)  **1.36 (1.14, 1.62)**  **1.37(1.13, 1.68)**  **1.62(1.28, 2.06)** |
| *Social Support* | |  | *Social Support* |  |  |
| +Social Support | | -0.18 (-0.52, 0.16) | High vs. Low +SS | 0.83 (0.66, 1.03) | 0.86 (0.73, 1.17) |
| -Social Support | | 0.03 (-0.07, 0.14) | High vs. Low -SS | 1.08 (0.85, 1.36) | **1.25 (1.05, 1.49)** |
| *Global Mastery* | |  | *Global Mastery* |  |  |
|  | | -0.17 (-0.82, 0.49) | High vs. Low Mastery | 0.89 (0.75, 1.06) | 0.99 (0.87, 1.13) |
| *Domain-specific Mastery* | |  | *Domain-specific Mastery* |  |  |
| Health  Social Life  Finances | | **-0.98 (-1.31, -0.66)**  -0.04 (-0.38, 0.29)  -0.20 (-0.48, 0.08) | H vs. L Health  H vs. L Social Life  H vs. L Finances | **0.53 (0.45, 0.63)**  1.01 (0.87, 1.20)   - 1. **0.70, 0.98)** | **0.65 (0.57, 0.74)**  1.00 (0.86, 1.13)  0.94 (0.82, 1.07) |
| **Note:** The 2014 Edition of Health U.S., <http://www.cdc.gov/nchs/data/hus/hus14.pdf#071> has a special focus on persons aged 55 to 64 years. In that volume, Figure 26 shows the national experience with health care utilization based on reporting from the National Health Interview Survey (NHIS) is an annual survey of representative group of U.S. adults and has run continuously since 1957. This cross sectional survey measures doctor visits, emergency department visits, and hospital stays. In 2013, 86.7 percent of persons in this age group had a doctor visit. The results from NHIS have important implication for our analysis of the HRS cohort. These are:   1. Doctor visits are nearly universal in this age group. 2. Overnight hospital stays are not - 10.1 percent. 3. 43.3 percent report 3 or few visit while 12.6 percent reported none at all. (55.9 % of U.S. adults in the age range comparable to our HRS cohort.   One of our underlying assumptions is that the sickest of adults this group utilize health care for a variety of remediable factors. These remediable factors, in future studies, may hold the key to creating therapeutic approach to building resilience.  **BOLD VALUES ARE STATISTICALLY SIGNIFICANT**. H = high; L = Low; +Social support = Positive Social Support, -Social support = Negative social support.  **Column A**: Resilience indicators (*Exposure)*. Shown as either categories (cumulative lifetime adversity) or continuous scales (+Social Support, -Social Support, Global Mastery, and Domain Specific Mastery)  **Column B:** The outcome is estimated as a ‘Number of Doctor visits’.  **Column C**: Comparison of Dichotomized resilience indicators (*Exposure)*. Shown as High versus Low.  **Column D**: Doctor visits 20 or more in the prior two years. Odds ratio for participants in specific categories of cumulative lifetime adversity; Participants with the highest social support; global mastery, and domain specific mastery scores.  **Column E**: Same as D but with Doctor visits set at 7 or more.  Estimates are derived from a logistic regression model with ≥20 doctor visits, any hospitalization and improvements in SRH as dependent variables. Multivariable model is adjusted for the following potential confounders: history of loss, age, sex, level of education, smoking, body mass index, physical activity level (any vs. none), US vs. foreign born status, fall, insomnia, and racial classification (black, white vs. other). **CI = confidence interval. | | | | | |
